# Supplementary material
Source: HighWire-hosted journal article supplement (https://bmjopen.bmj.com/content/8/1/e019164)
Supplement: inline-supplementary-material-1 [file inline-supplementary-material-1.pdf]

1993 Pelotas Birth Cohort

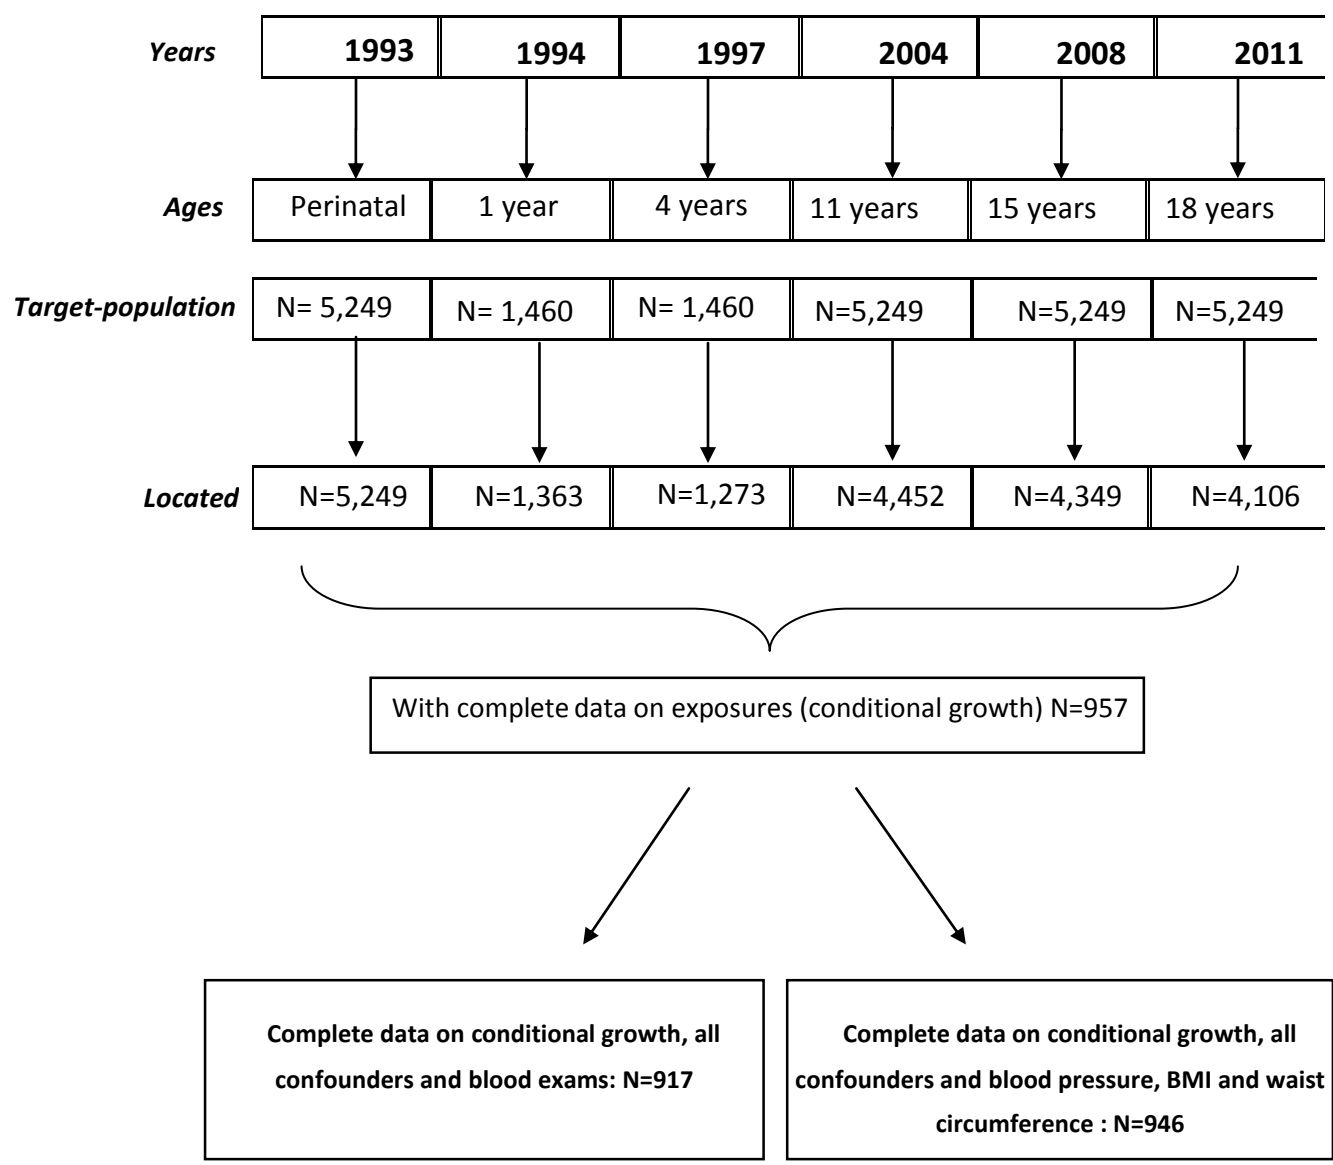

Figure 1. Description of the 1993 Pelotas (Brazil) Birth Cohort.
