# Supplementary material
Source: HighWire-hosted journal article supplement (https://bmjopen.bmj.com/content/8/1/e019164)
Supplement: inline-supplementary-material-4 [file inline-supplementary-material-4.pdf]

**Supplementary file 4**

Table 1. Association of conditional relative weight and conditional height with mean arterial pressure at 18 years old in boys and girls. 1993 Pelotas Birth Cohort.

|                           | Mean arterial pressure (MAP) |                    |
|---------------------------|------------------------------|--------------------|
|                           | Boys                         | Girls              |
| Conditional weight        |                              |                    |
| CWh 0 to1 y               | 0.04 (-0.04; 0.13)           | 0.06 (-0.03; 0.14) |
| CWh 1 to 4 y              | 0.08 (-0.01; 0.17)           | 0.14 (0.05; 0.22)  |
| CWh 4 to11 y              | 0.11 (0.02; 0.19)            | 0.14 (0.06; 0.22)  |
| CWh 11 to15 y             | 0.08 (0.01; 0.18)            | 0.15 (0.07; 0.22)  |
| CWh 15 to 18 y            | 0.11 (0.02; 0.20)            | 0.16 (0.09; 0.24)  |
| Conditional length/height |                              |                    |
| CH 0 to 1 y               | 0.12 (0.31; 0.22)            | 0.05 (-0.03; 0.13) |
| CH 1 to 4 y               | 0.07 (-0.20; 0.17)           | 0.13 (0.04; 0.22)  |
| CH 4 to 11 y              | 0.20 (0.11; 0.28)            | 0.17 (0.09; 0.24)  |
| CH 11 to 15 y             | 0.04 (-0.05; 0.13)           | 0.05 (-0.02; 0.13) |
| CH 15 to 18 y             | 0.05 (-0.04; 0.13)           | 0.00 (-0.07; 0.07) |

CWh: conditional relative weight, CH: conditional height

Data are  $\beta$  (95% CI). The outcome variables were normalized. Regression coefficient ( $\beta$ ) values were calculated with linear regression models and indicate the SD change in the outcome per SD change in the predictor. All models were adjusted for mother's education (years of schooling) and household wealth (in minimum wages) at birth and skin color of the adolescent.
